# Supplementary material
Source: PubMed Central journal article supplement (PMC2517015)
Supplement: 108.128892_2.pdf [file 108.128892_2.pdf]

## Supplemental Text S2: Derivation of an analytical solution for the bulk activation model

Here we derive an exact solution for the bulk activation model described in the main text. In this model, Ras-GDP particles are converted at random to Ras-GTP at a constant frequency (# of molecules/s), taken as  $f_{GEF}$ . The steady-state equation conserving the density of free Ras-GTP in the membrane ( $n_S^*$ ) and the corresponding boundary condition at the receptor ( $r = S$ ) are given by

$$\begin{aligned} \frac{\partial n_S^*}{\partial t} &= D\nabla^2 n_S^* + \frac{f_{GEF}}{A} - k_{GAP} n_S^* - k_{on,SP} n_S^* + k_{off,SP} n_{PS} = 0; \\ -2\pi SD \frac{\partial n_S^*}{\partial r} \Big|_{r=S} &= 2 \left( -K_{RP+S} P_P n_S^* \Big|_{r=S} + k_{off,SP} P_{PS} \right). \end{aligned} \quad (S2-1)$$

Here,  $n_{PS}$  is the density of Ras/PI3K complexes in the membrane, and  $P_P$  and  $P_{PS}$  are defined as the probabilities that each PI3K binding site on the receptor is occupied by PI3K alone and PI3K in complex with Ras-GTP, respectively. The factor of 2 in the boundary condition accounts for the two PI3K binding sites on the receptor (note that, for the full model, the boundary condition would have also included the time-averaged frequency of Ras-GTP generation by receptor-bound GEF activity). The steady-state conservation equation and boundary condition for  $n_{PS}$  are

$$\begin{aligned} \frac{\partial n_{PS}}{\partial t} &= D\nabla^2 n_{PS} + k_{on,SP} n_S^* - k_{off,SP} n_{PS} = 0; \\ -2\pi SD \frac{\partial n_{PS}}{\partial r} \Big|_{r=S} &= 2 \left[ k_{off,RP} P_{PS} - K_{R+PS} (1 - P_P - P_{PS}) n_{PS} \Big|_{r=S} \right]. \end{aligned} \quad (S2-2)$$

In this model,  $P_P$  and  $P_{PS}$  are conserved by

$$\begin{aligned} \frac{dP_P}{dt} &= k_{on,RP} (1 - P_P - P_{PS}) - k_{off,RP} P_P + k_{off,SP} P_{PS} - K_{RP+S} P_P n_S^* \Big|_{r=S} = 0; \\ \frac{dP_{PS}}{dt} &= K_{RP+S} P_P n_S^* \Big|_{r=S} + K_{R+PS} (1 - P_P - P_{PS}) n_{PS} \Big|_{r=S} - (k_{off,RP} + k_{off,SP}) P_{PS} = 0. \end{aligned} \quad (S2-3)$$

From Eqs. S2-1-3, it follows that

$$\begin{aligned} -2\pi SD \frac{\partial (n_S^* + n_{PS})}{\partial r} \Big|_{r=S} &= -2 \frac{dP_{PS}}{dt} = 0; \\ \therefore n_S^* + n_{PS} &= \text{constant}. \end{aligned} \quad (S2-4)$$

Adding Eqs. S2-1 and -2, it is subsequently found that

$$\begin{aligned} \frac{\partial (n_S^* + n_{PS})}{\partial t} &= \frac{f_{GEF}}{A} - k_{GAP} n_S^* = 0; \\ n_S^* &= \frac{f_{GEF}}{k_{GAP} A}; \quad n_{PS} = \frac{k_{on,SP}}{k_{off,SP}} n_S^* = \frac{k_{on,SP}}{k_{off,SP}} \frac{f_{GEF}}{k_{GAP} A}. \end{aligned} \quad (S2-5)$$

Finally, incorporating these results into Eq. S2-3,

$$T_p = P_p + P_{PS} = \frac{k_{on,RP} + K_{R+PS} \frac{k_{on,SP}}{k_{off,SP}} \frac{f_{GEF}}{k_{GAP}A}}{k_{off,RP} + k_{on,RP} + K_{R+PS} \frac{k_{on,SP}}{k_{off,SP}} \frac{f_{GEF}}{k_{GAP}A}}. \quad (S2-6)$$

The fraction of Ras-mediated receptor binding events,  $M_p$ , is found from  $T_p$  as explained in the main text.

$$M_p = \frac{K_{R+PS} \frac{k_{on,SP}}{k_{off,SP}} \frac{f_{GEF}}{k_{GAP}A}}{k_{on,RP} + K_{R+PS} \frac{k_{on,SP}}{k_{off,SP}} \frac{f_{GEF}}{k_{GAP}A}} = \frac{K_{RP+S} \frac{f_{GEF}}{k_{off,SP}} \frac{f_{GEF}}{k_{GAP}A}}{1 + \frac{K_{RP+S} \frac{f_{GEF}}{k_{off,SP}} \frac{f_{GEF}}{k_{GAP}A}}{k_{on,RP} + K_{R+PS} \frac{k_{on,SP}}{k_{off,SP}} \frac{f_{GEF}}{k_{GAP}A}}}. \quad (S2-7)$$
